# Supplementary material
Source: PubMed Central journal article supplement (PMC5451350)
Supplement: 2016_157768-Disclosures_and_Contributions.pdf [file 2016_157768-Disclosures_and_Contributions.pdf]

Haematologica  
HAEMATOL/2016/157768  
Version 5

Survival of patients with lymphoplasmacytic lymphoma and solitary plasmacytoma in Germany and the United States in the early 21st century

Janick Weberpals, Dianne Pulte, Lina Jansen, Sabine Luttmann, Bernd Holleczeck, Alice Nennecke, Meike Rensing, Alexander Katalinic, Maximilian Merz, and Hermann Brenner  
(Collaborative Groups: GEKID Cancer Survival Working Group)

Disclosures: DP received funding for unrelated clinical trials from Apopharma and Selexys within the past 36 months. The other authors have no financial relationships to disclose.

Contributions: All authors contributed to the interpretation of the data and writing or revision of the manuscript. DP, JW, LJ, and HB designed and planned the study. JW performed the primary analysis. DP wrote the manuscript. MM critically reviewed the manuscript and contributed to the revision of the manuscript and interpretation of the data.
